# Supplementary material for: High-performance perovskite light-emitting diodes via morphological control of perovskite films
Source: Royal Society of Chemistry journal article supplement (doi:10.1039/c5nr05604g), 2015-11-13
Supplement: c5nr05604g1.pdf [file c5nr05604g1.pdf]

## Supporting Information

# High-Performance Perovskite Light-emitting Diodes via Morphological Control of Perovskite Film

Jae Choul Yu,<sup>‡a</sup> Da Bin Kim,<sup>‡a</sup> Eui Dae Jung,<sup>a</sup> Bo Ram Lee<sup>a</sup> and Myoung Hoon Song<sup>\*a</sup>

<sup>a</sup> School of Materials Science Engineering/KIST-UNIST Ulsan Center for Convergent Materials, Ulsan National Institute of Science and Technology (UNIST), UNIST-gil 50, Ulsan, 689-798, Republic of Korea.

E-mail: [mhsong@unist.ac.kr](mailto:mhsong@unist.ac.kr)

<sup>‡</sup>These authors contributed equally to this work.

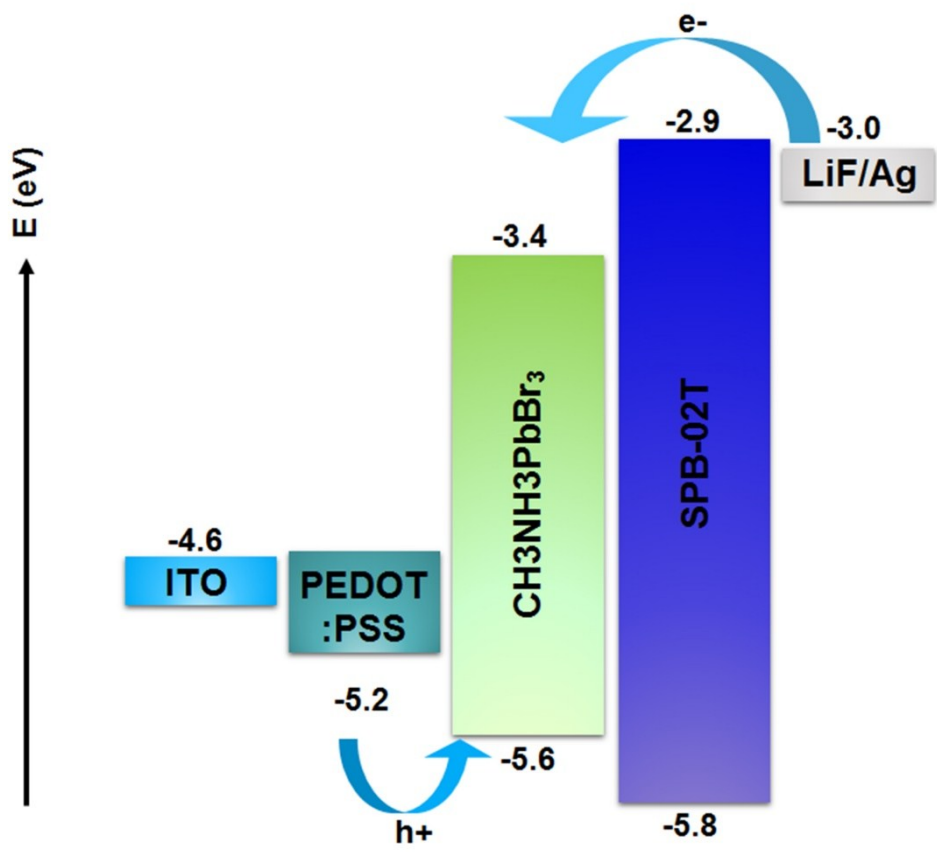

**Figure S1.** Energy levels of the various device components of the PeLEDs.

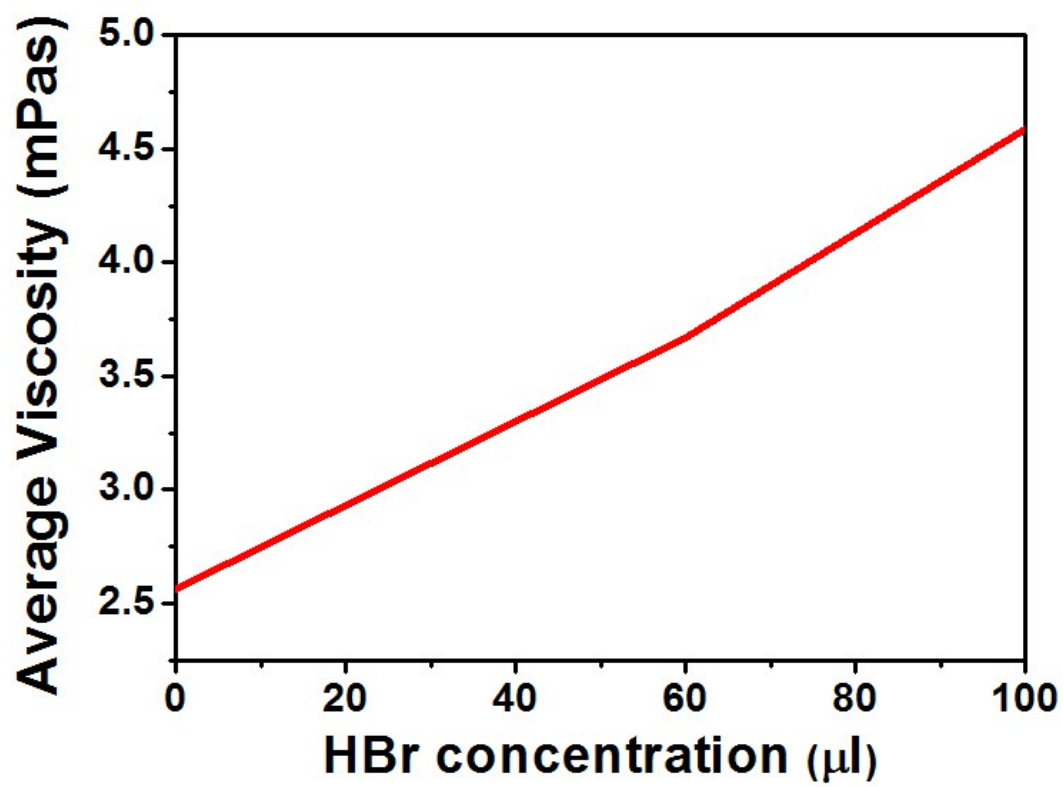

**Figure S2.** Average viscosity data gathered by rheometer; the concentration of HBr in the  $\text{MAPbBr}_3$  precursor solution ranged from 0 to 100  $\mu\text{L}$ .

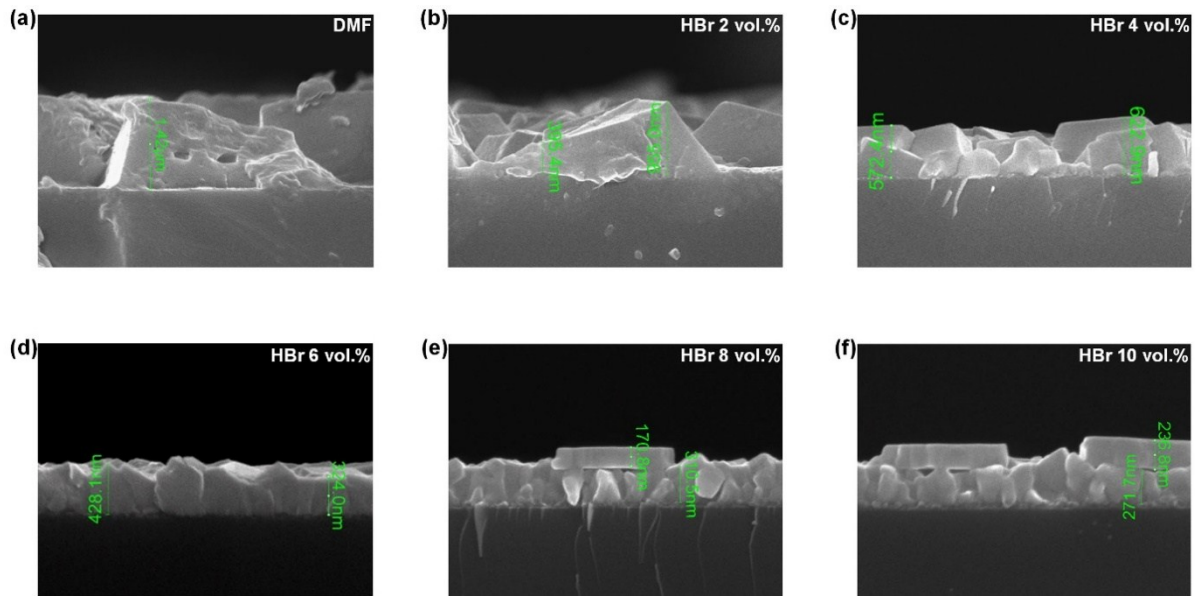

**Figure S3.** Cross-sectional SEM images of MAPbBr<sub>3</sub> layers with different volume ratios of HBr in the DMF/HBr cosolvent. The green line indicates the thickness of the MAPbBr<sub>3</sub> layers.

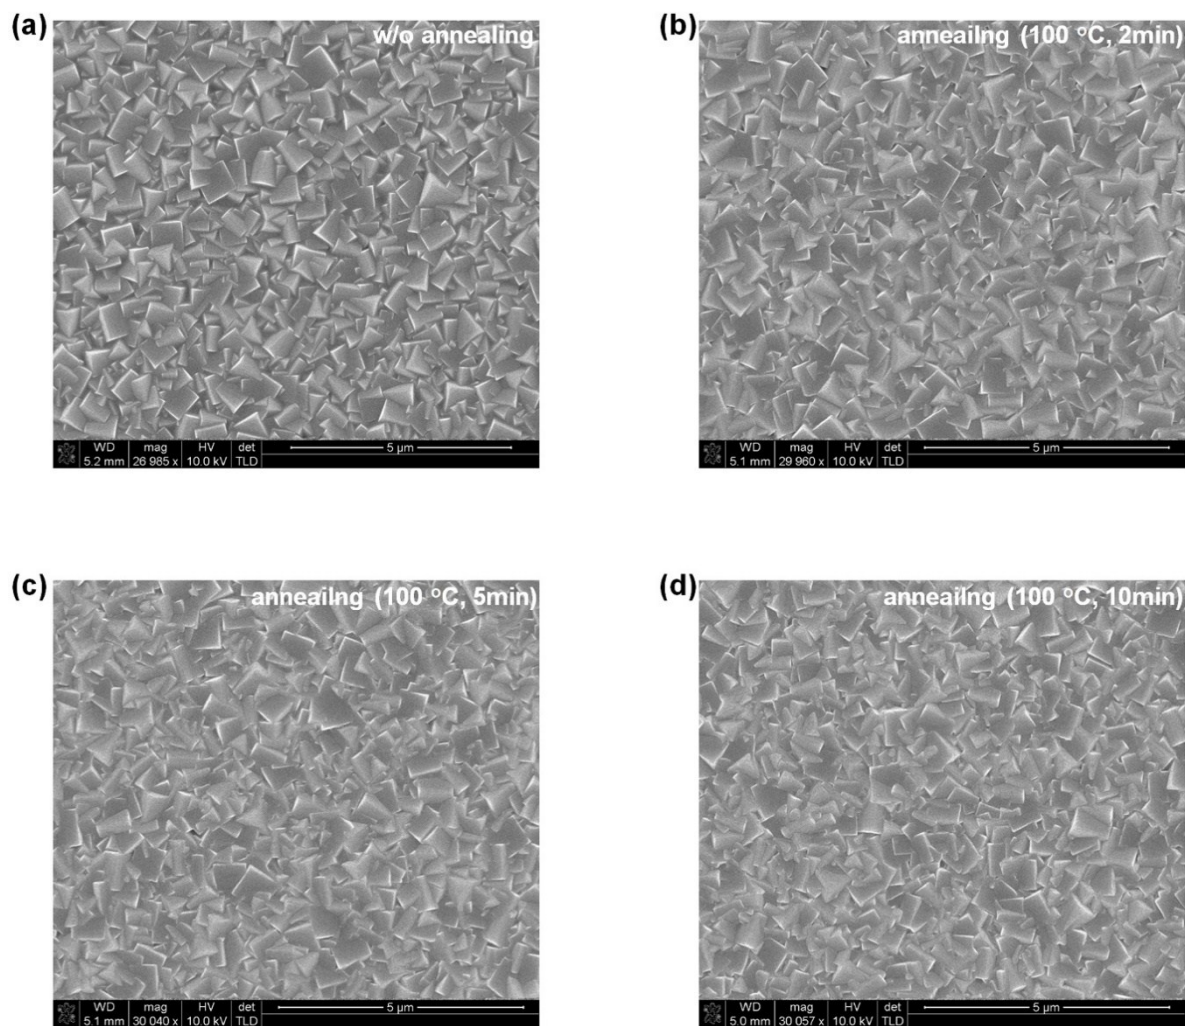

**Figure S4.** SEM images showing the top-view of the MAPbBr<sub>3</sub> films prepared using 6 vol.% of HBr in the DMF/HBr cosolvent; the films were deposited onto a PEDOT:PSS substrate at 100 °C and at different annealing times.

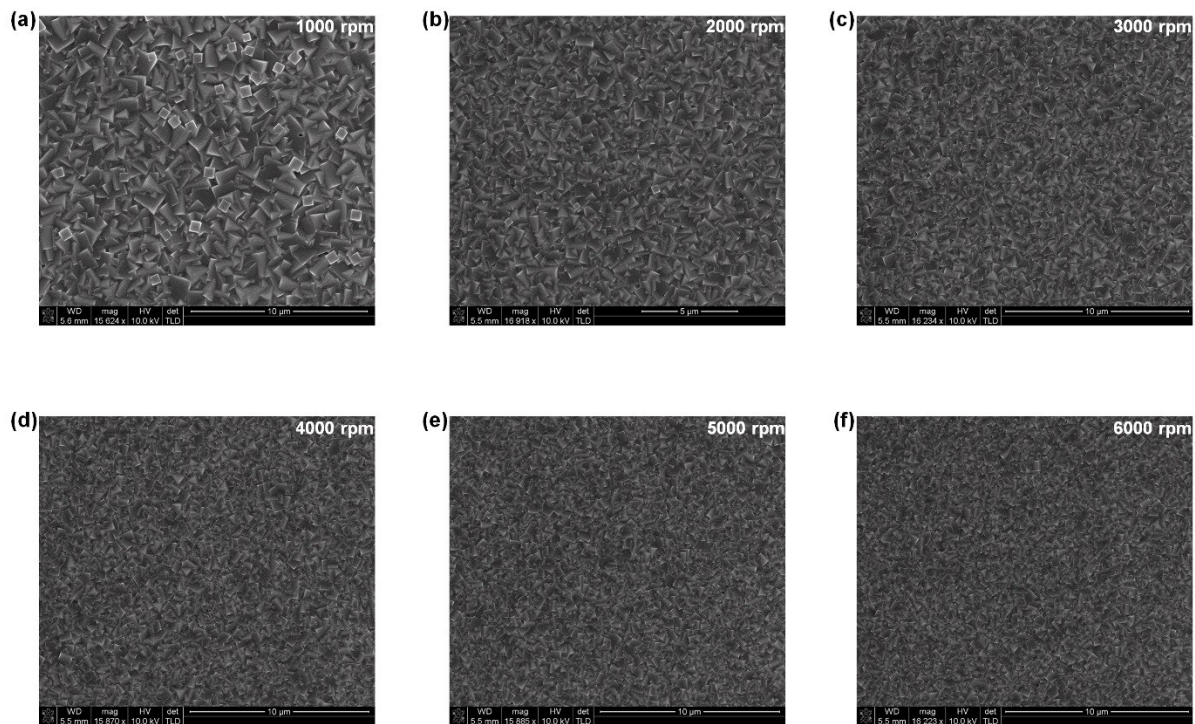

**Figure S5.** SEM images showing the top-view of the MAPbBr<sub>3</sub> films prepared using 6 vol.% of HBr in the DMF/HBr cosolvent; the films were deposited onto a PEDOT:PSS substrate using different spin speeds.

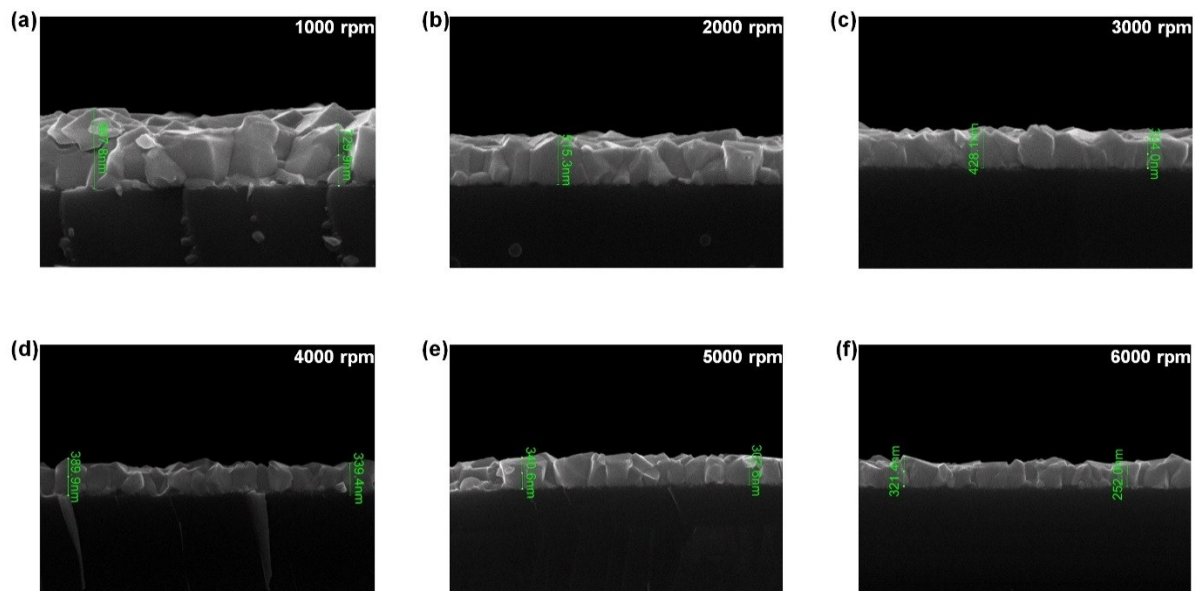

**Figure S6.** Cross-sectional SEM images of the MAPbBr<sub>3</sub> films prepared using 6 vol.% of HBr in the DMF/HBr cosolvent; the films were deposited onto a PEDOT:PSS substrate at different spin speeds.

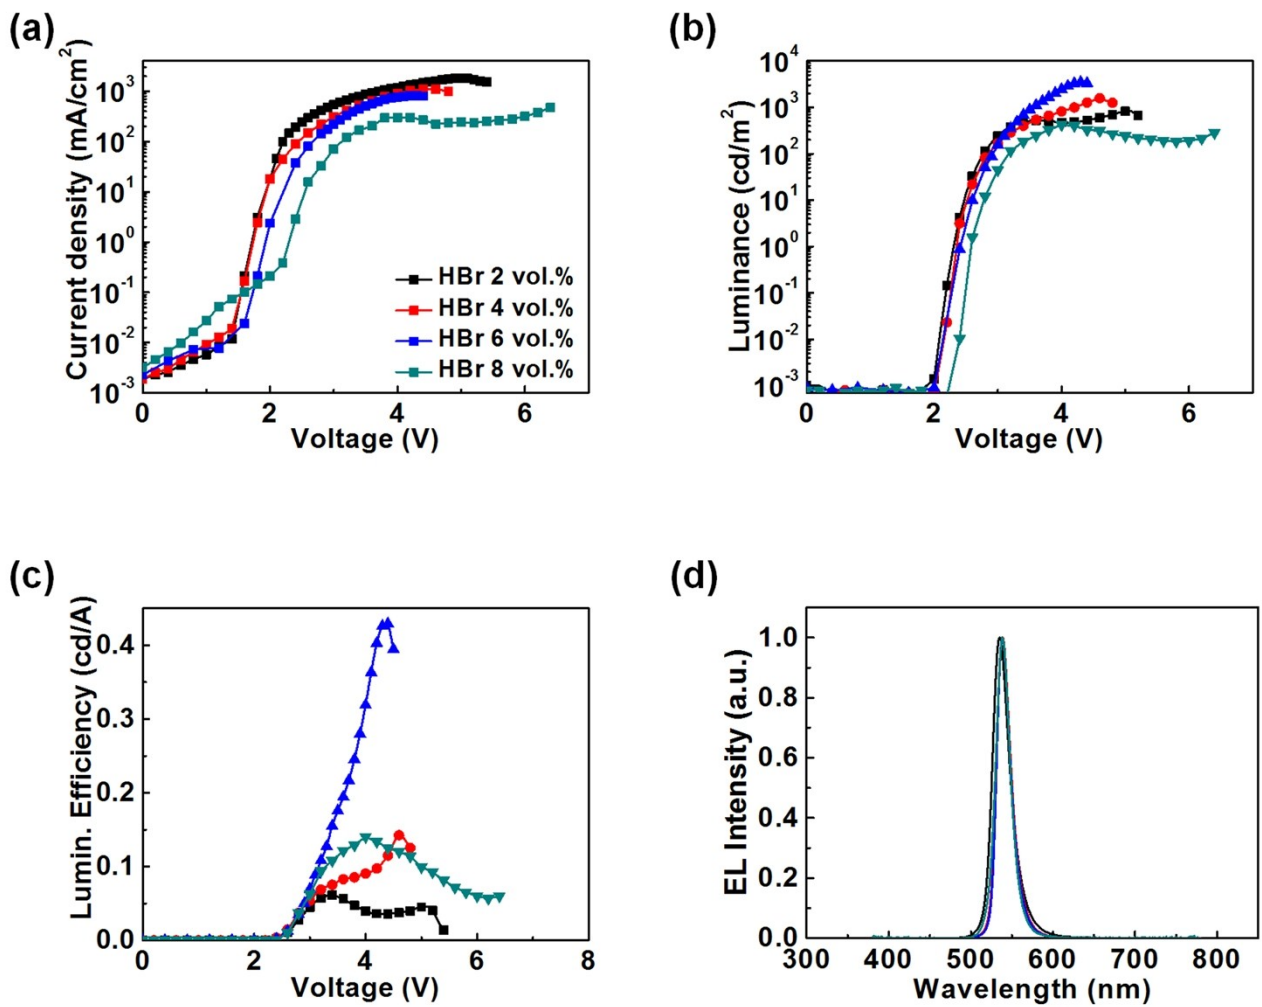

**Figure S7.** (a) *J-V*, (b) *L-V*, and (c) *LE-V* characteristic and (d) electroluminescence (EL) spectra of PeLED devices with the MAPbBr<sub>3</sub> layers deposited using different concentrations of HBr in the DMF/HBr cosolvent.



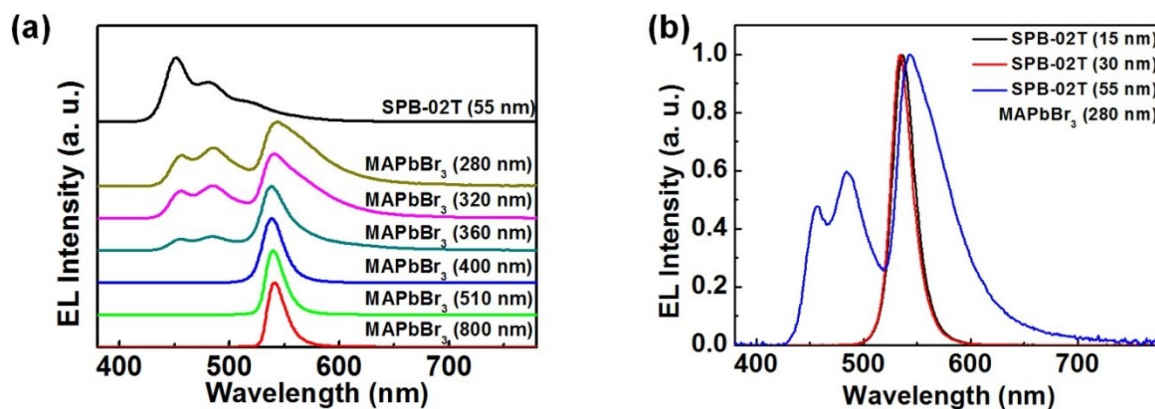

**Figure S8.** (a) EL spectra of PeLEDs prepared with different spin speeds of the MAPbBr<sub>3</sub> precursor solution and with 55-nm-thick SPB-02T. (b) EL spectra of the PeLEDs prepared with 6 vol.% of HBr in the DMF/HBr cosolvent; the films were deposited at a spin speed of 6,000 rpm (280-nm thickness of MAPbBr<sub>3</sub>) and with different thicknesses of SPB-02T (15-55 nm) as electron transport layers.

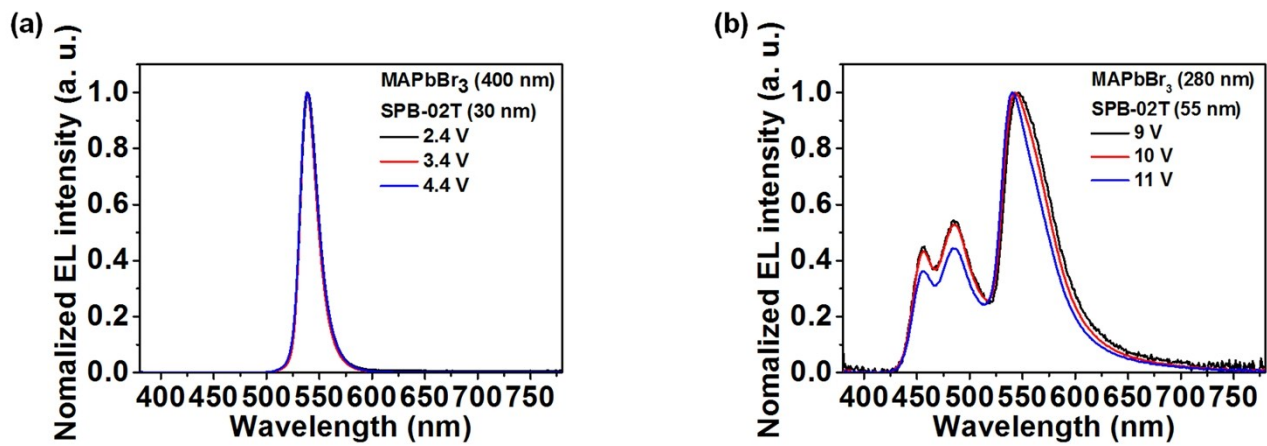

**Figure S9.** EL spectra of the device with (a) 400 nm-thick MAPbBr<sub>3</sub> and 30 nm-thick SPB-02T and (b) 280 nm-thick MAPbBr<sub>3</sub> and 55 nm-thick SPB-02T under applied voltage.

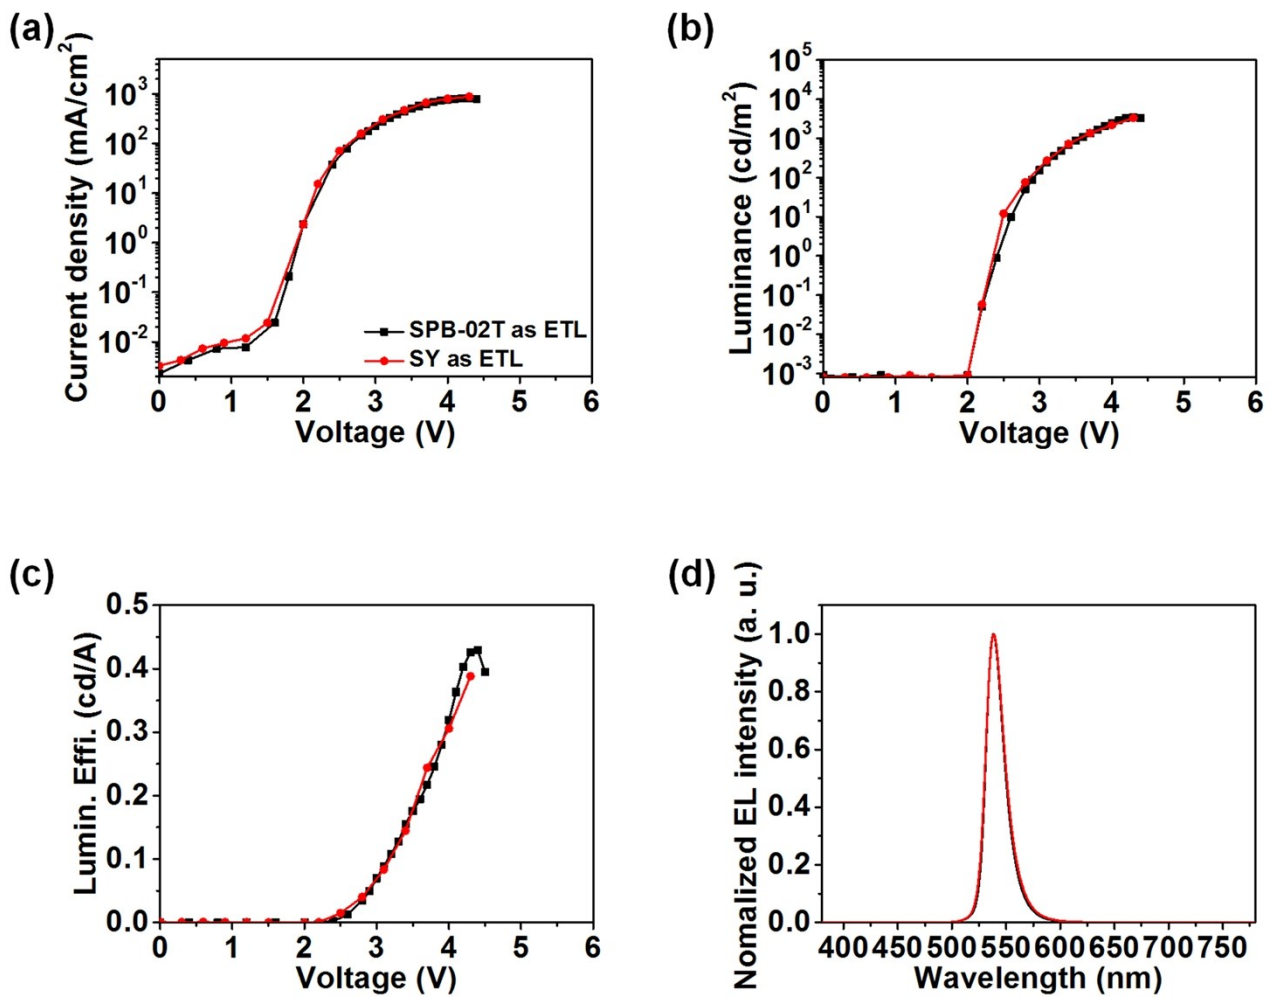

**Figure S10.** (a)  $J$ - $V$ , (b)  $L$ - $V$ , and (c)  $LE$ - $V$  characteristic and (d) Normalized EL spectra of PeLEDs (ITO/PEDOT:PSS/MAPbBr<sub>3</sub> (400 nm)/SPB-02T (30 nm, black-line) or SY (30 nm, red-line)/LiF/Ag).

**Table S1.** Summary of the device performances of PeLEDs with MAPbBr<sub>3</sub> prepared using different concentration of HBr in the DMF/HBr cosolvent.

| <b>Devices configuration</b><br>ITO/PEDOT:PSS/MAPbBr <sub>3</sub> (adding HBr)/SPB-02T/LiF/Ag | <b>L<sub>max</sub> [cd/m<sup>2</sup>]</b><br>@ bias | <b>LE<sub>max</sub> [cd/A]</b><br>@ bias |
|-----------------------------------------------------------------------------------------------|-----------------------------------------------------|------------------------------------------|
| HBr 2 vol.%                                                                                   | 820 @ 5.0                                           | 0.06 @ 3.4                               |
| HBr 4 vol.%                                                                                   | 1575 @ 4.6                                          | 0.14 @ 4.6                               |
| HBr 6 vol.%                                                                                   | 3490 @ 4.3                                          | 0.43 @ 4.3                               |
| HBr 8 vol.%                                                                                   | 422 @ 4.0                                           | 0.14 @ 4.0                               |

**Table S2. Comparison of our work with previous literature**

| Previous literature          | structure       | Emission Color | $L_{\max}$ [cd/m <sup>2</sup> ] | $LE_{\max}$ [cd/A] | $EQE_{\max}$ [%]  |
|------------------------------|-----------------|----------------|---------------------------------|--------------------|-------------------|
| S1<br>[Adv. Mater., 2015]    | conventional    | Green (Ref.)   | -                               | -                  | -                 |
|                              |                 | Green          | 20,000                          | -                  | 0.8               |
| S2<br>[Adv. Mater., 2015]    | conventional    | Green (Ref.)   | 118                             | 0.11               | 0.026             |
|                              |                 | Green          | 545                             | 0.22               | 0.051             |
| S3<br>[Nat. Nanotech., 2014] | inverted        | Green          | 364                             | 0.3                | 0.1               |
| S4<br>[Adv. Mater., 2015]    | inverted        | Green (Ref.)   | 1.38                            | 0.00165            | 0.000393          |
|                              |                 | Green          | 417                             | 0.577              | 0.125             |
| S5<br>[Adv. Mater., 2015]    | inverted        | Green (Ref.)   | 0.2                             | -                  | -                 |
|                              |                 | Green          | 550                             | -                  | -                 |
| S6<br>[Nano Lett., 2015]     | inverted        | Green (Ref.)   | ~200                            | X                  | 0.01              |
|                              |                 | Green          | 580                             | X                  | 1.2               |
| <b>Our work</b>              | <b>inverted</b> | <b>Green</b>   | <b>3490</b>                     | <b>0.43 @ 4.3</b>  | <b>0.10 @ 4.3</b> |

**Table S3.** Summary of the device performances of PeLEDs (ITO/PEDOT:PSS/MAPbBr<sub>3</sub> (400 nm)/SPB-02T (30 nm, black-line) or SY (30 nm, red-line)/LiF/Ag).

| <b>Devices configuration</b>                           | <b>L<sub>max</sub> [cd/m<sup>2</sup>]<br/>@ bias</b> | <b>LE<sub>max</sub><br/>[cd/A]<br/>@ bias</b> |
|--------------------------------------------------------|------------------------------------------------------|-----------------------------------------------|
| <b>ITO/PEDOT:PSS/MAPbBr<sub>3</sub>/SPB-02T/LiF/Ag</b> | <b>3490 @ 4.3</b>                                    | <b>0.43 @ 4.3</b>                             |
| <b>ITO/PEDOT:PSS/MAPbBr<sub>3</sub>/SY/LiF/Ag</b>      | <b>3313 @ 4.3</b>                                    | <b>0.39 @ 4.3</b>                             |

## Supplementary References

- S1. J. Wang, N. Wang, Y. Jin, J. Si, J. Tan, H. Du, L. Cheng, X. Dai, S. Bai, H. He, Z. Ye, M. L. Lai, R. H. Friend, W. Huang, *Adv. Mater.* **2015**, *27*, 2311.
- S2. J. C. Yu, D. B. Kim, G. Baek, B. R. Lee, E. D. Jung, S. Lee, J. H. Chu, D. Lee, K. J. Choi, S. Cho, M. H. Song, *Adv. Mater.* **2015**, *27*, 3492.
- S3. Z. K. Tan, R. S. Moghaddam, M. L. Lai, P. Docampo, R. Higler, F. Deschler, M. Price, A. Sadhanala, L. M. Pazos, D. Credgington, F. Hanusch, T. Bein, H. J. Snaith, R. H. Friend, *Nature nanotechnology* **2014**, *9*, 687.
- S4. Y. H. Kim, H. Cho, J. H. Heo, T. S. Kim, N. Myoung, C. L. Lee, S. H. Im, T. W. Lee, *Adv. Mater.* **2015**, *27*, 1248.
- S5. R. L. Hoyer, M. R. Chua, K. P. Musselman, G. Li, M. L. Lai, Z. K. Tan, N. C. Greenham, J. L. MacManus-Driscoll, R. H. Friend, D. Credgington, *Adv. Mater.* **2015**, *27*, 1414.
- S6. G. Li, Z. Tan, D. Di, M. L. Lai, L. Jiang, J. H. Lim, R. H. Friend, N. C. Greenham, *Nano Lett.* **2015**, *15*, 2640.
